# Supplementary material for: Increased expression of miR-194-5p through the circPVRL3/miR-194-5p/SOCS2 axis promotes proliferation and metastasis in pancreatic ductal adenocarcinoma by activating the PI3K/AKT signaling pathway
Source: Springer Nature journal article supplement (doi:10.1186/s12935-022-02835-0), 2022-12-20

## Uncropped original western blots

**Figure 4C**

PANC-1 GAPDH

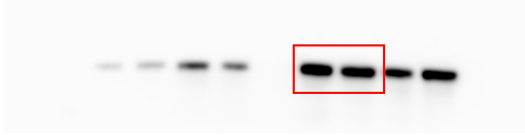

PANC-1 N-cadherin

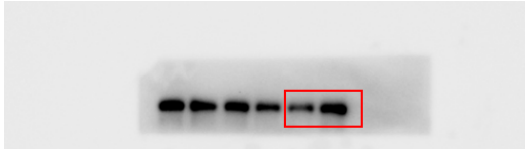

PANC-1 E-cadherin

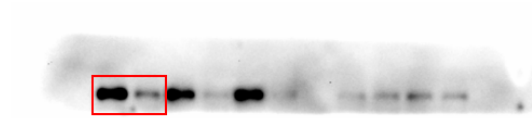

PANC-1 P21

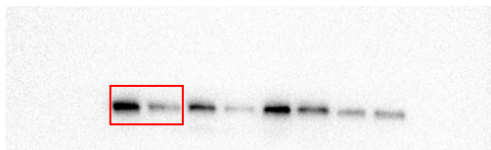

PANC-1 cyclin D1

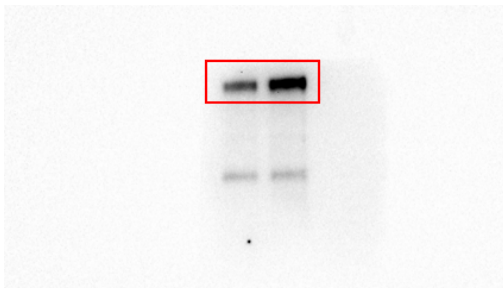

PANC-1 cyclin E1

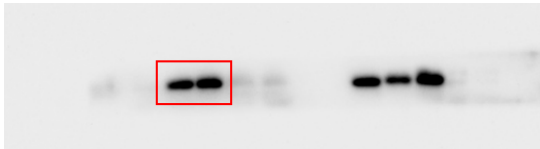

PANC-1 CDK2

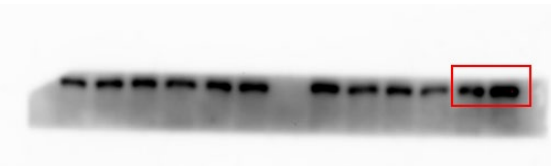

PANC-1 CDK4

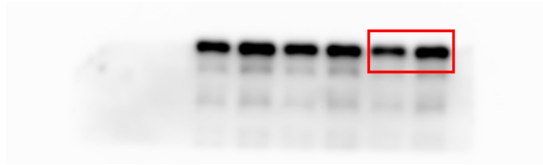

AsPC-1 GAPDH

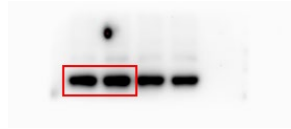

AsPC-1 N-cadherin

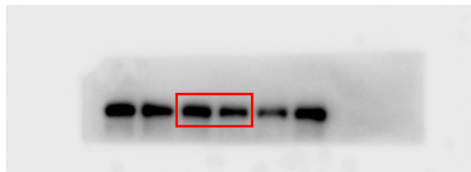

AsPC-1 E-cadherin

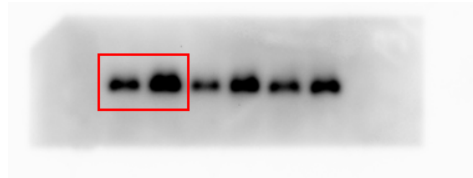

AsPC-1 P21

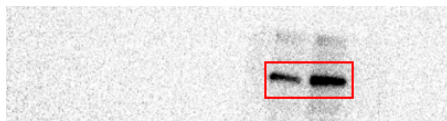

AsPC-1 cyclin D1

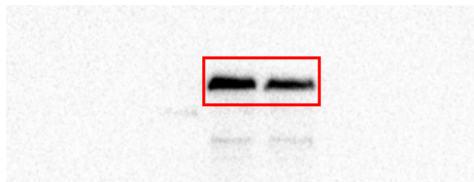

AsPC-1 cyclin E1

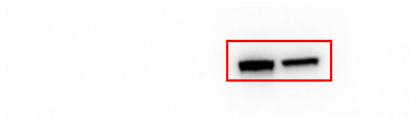

AsPC-1 CDK2

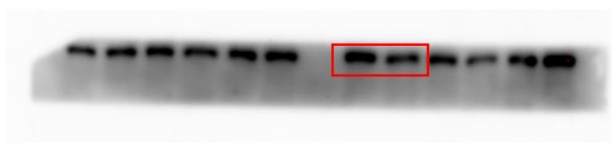

AsPC-1 CDK4

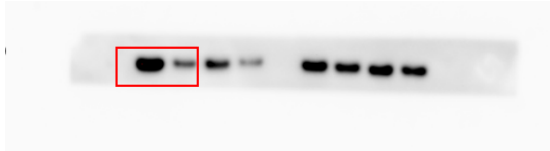

CFPAC-1 GAPDH

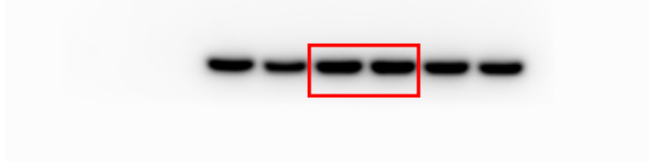

CFPAC-1 N-cadherin

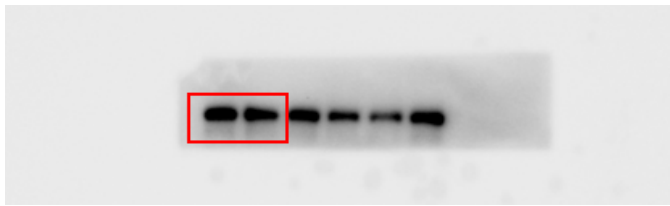

CFPAC-1 E-cadherin

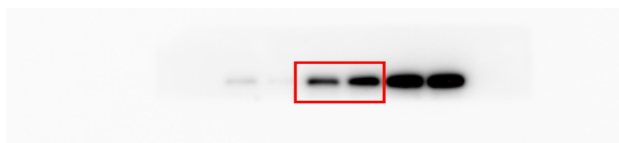

CFPAC-1 P21

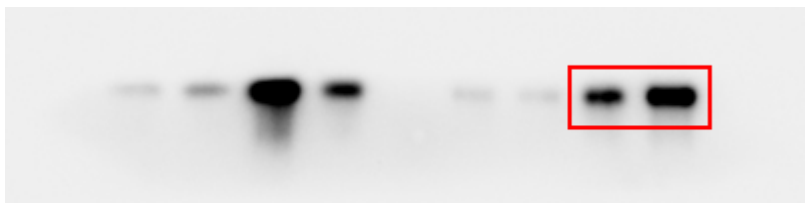

CFPAC-1 cyclin D1

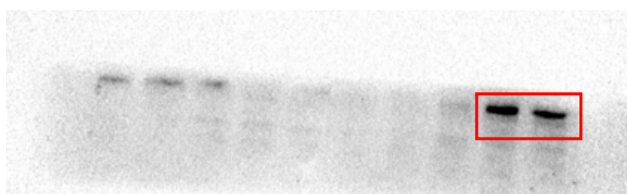

CFPAC-1 cyclin E1

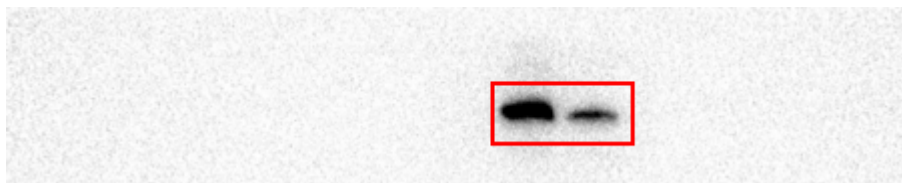

CFPAC-1 CDK2

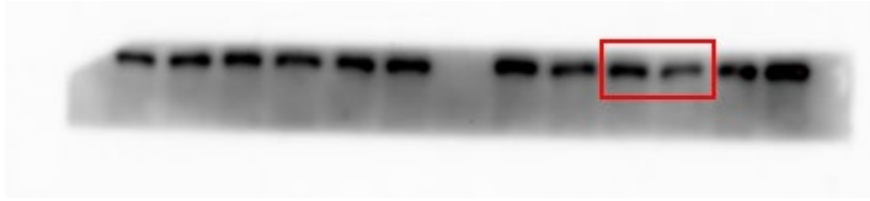

CFPAC-1 CDK4

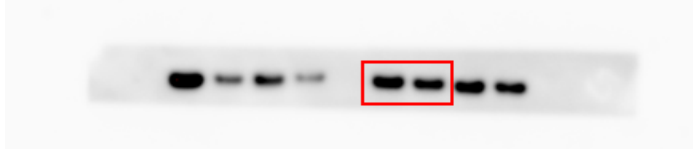

**Figure 7E**

PANC-1 GAPDH

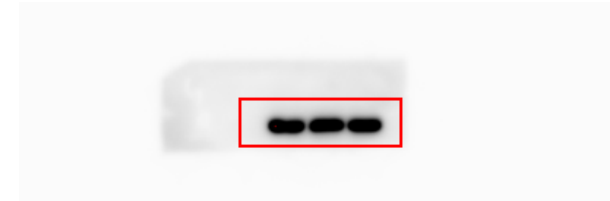

PANC-1 SOCS2

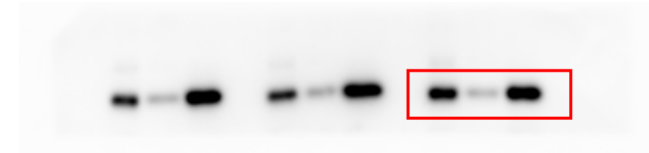

PANC-1 AKT

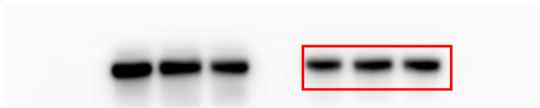

PANC-1 p-AKT 473

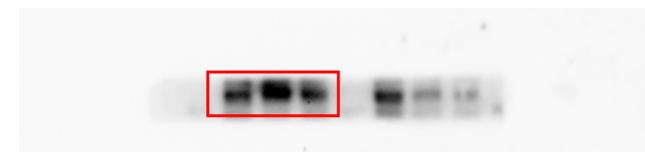

PANC-1 P13K

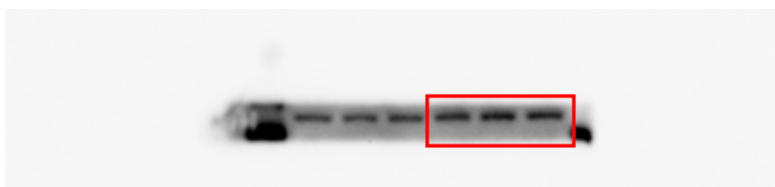

PANC-1 p-P13K

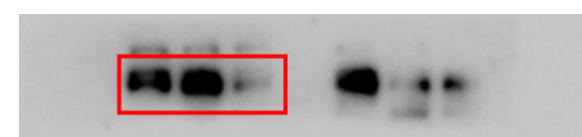

CFPAC-1 GAPDH

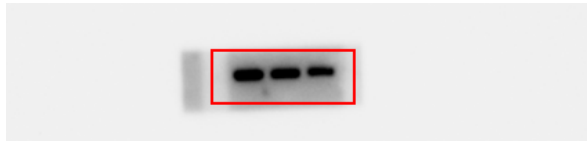

CFPAC-1 SOCS2

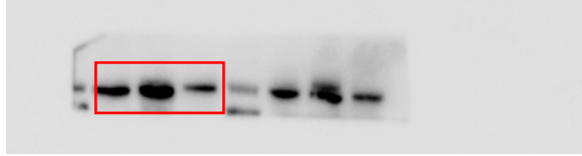

CFPAC-1 AKT

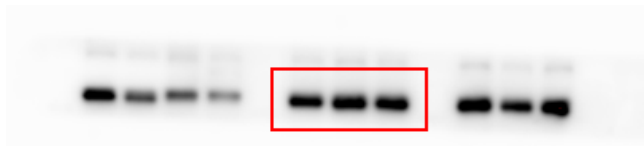

CFPAC-1 p-AKT 473

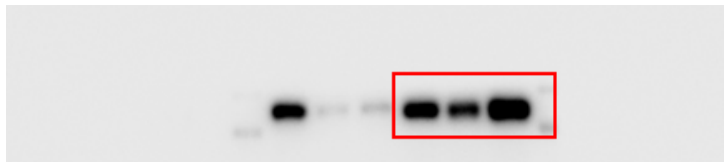

CFPAC-1 PI3K

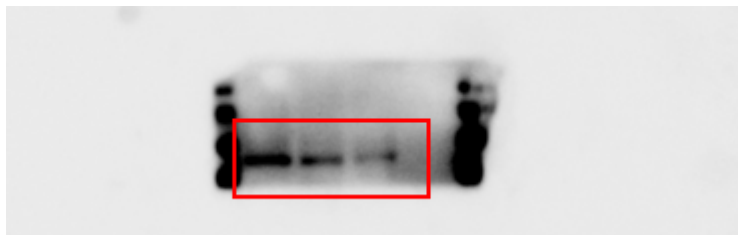

CFPAC-1 p-PI3K

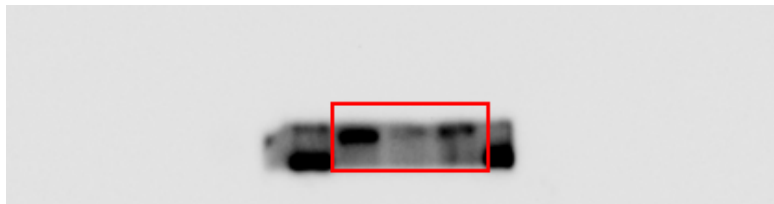

Figure 8B and Figure S3

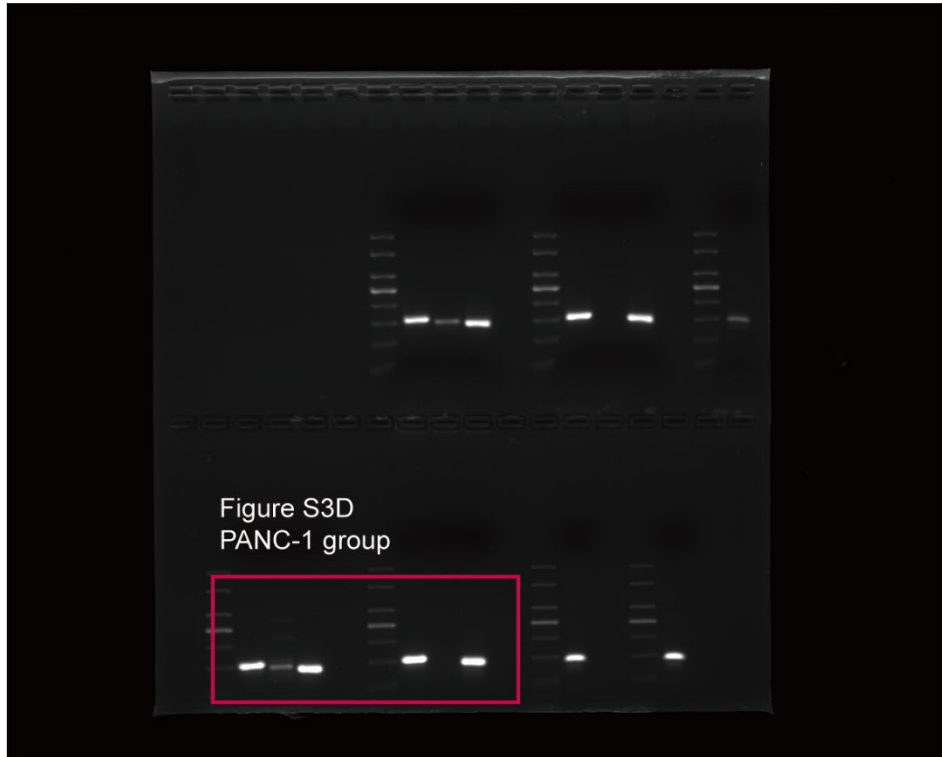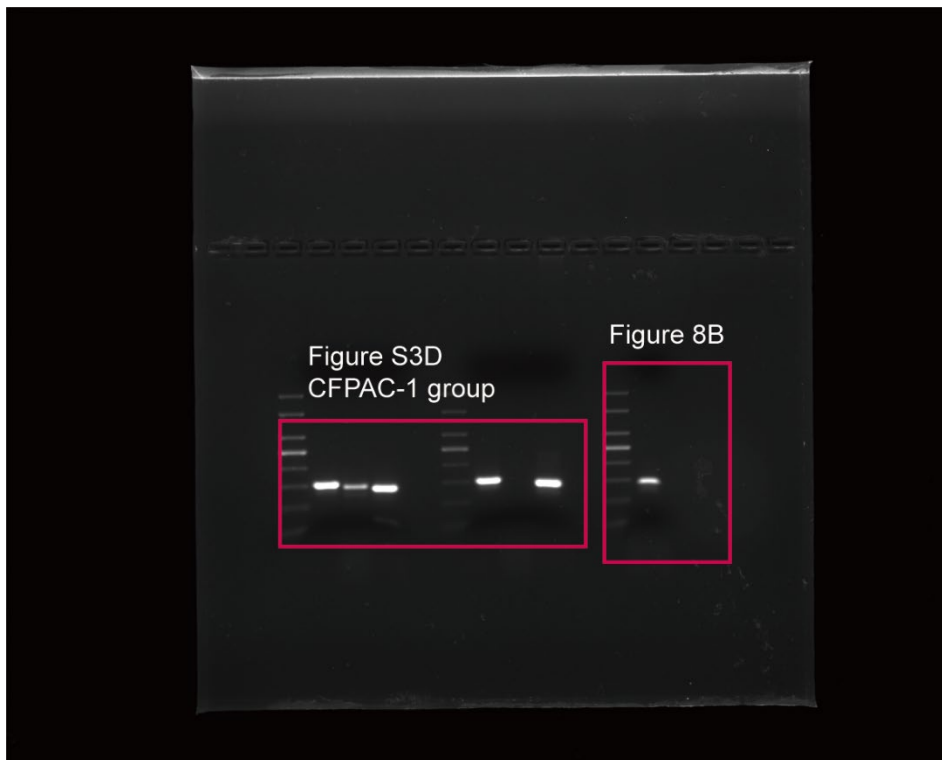

**Figure 9F**  
CFPAC-1 GAPDH

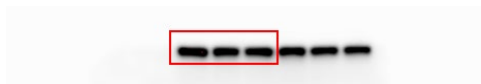

CFPAC-1 N-cadherin

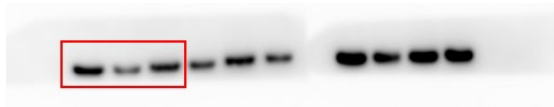

CFPAC-1 E-cadherin

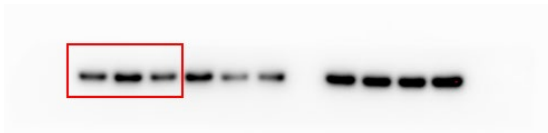

CFPAC-1 P21

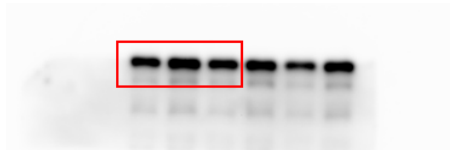

CFPAC-1 cyclinD1

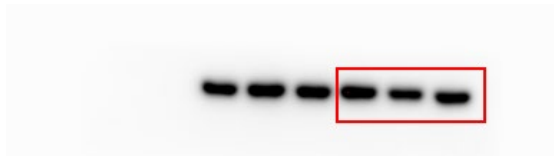

CFPAC-1 cyclinE1

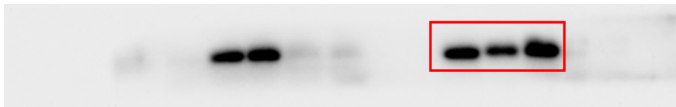

PANC-1 GAPDH

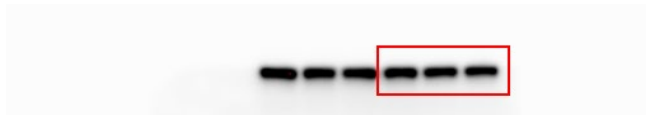

PANC-1 N-cadherin

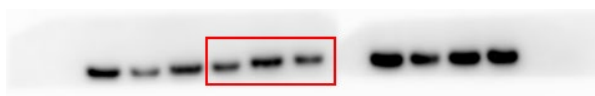

PANC-1 E-cadherin

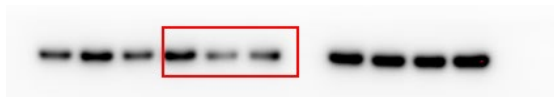

PANC-1 P21

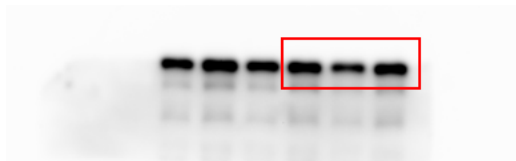

PANC-1 cyclinD1

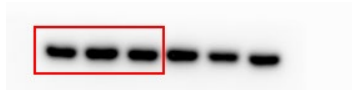

PANC-1 cyclinE1

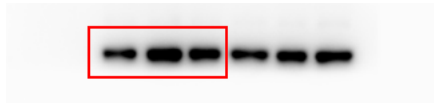

**Figure S2F**

CFPAC-1 GAPDH

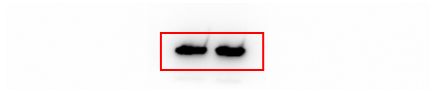

CFPAC-1 SOCS2

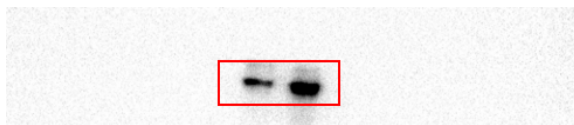

PANC-1 GAPDH

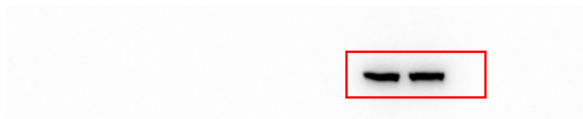

PANC-1 SOCS2

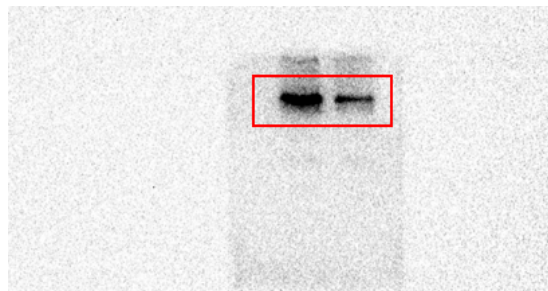

**Figure S3F**

CFPAC-1 GAPDH

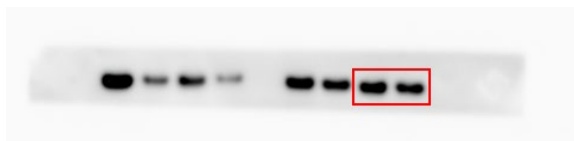

CFPAC-1 SOCS2

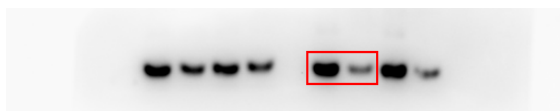

CFPAC-1 AKT

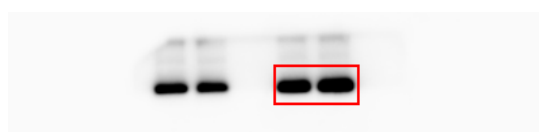



CFPAC-1 p-AKT

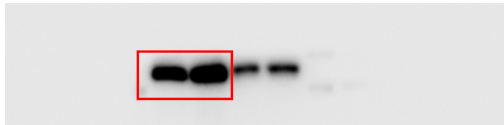

CFPAC-1 PI3K

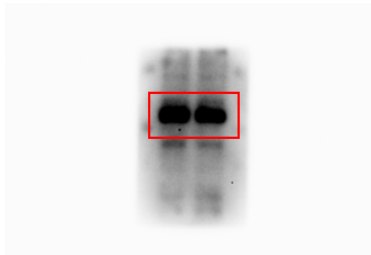

CFPAC-1 p-PI3K

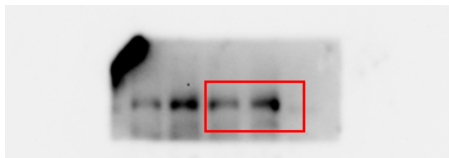

PANC-1 GAPDH

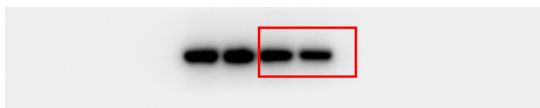

PANC-1 SOCS2

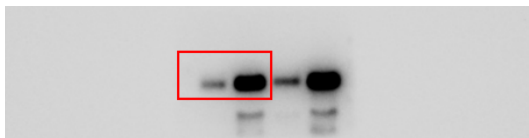

PANC-1 AKT

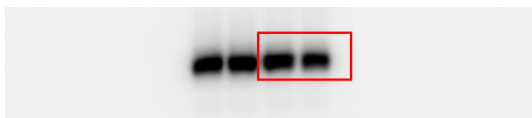

PANC-1 p-AKT

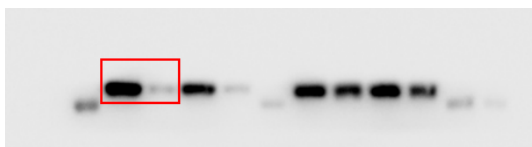

PANC-1 PI3K

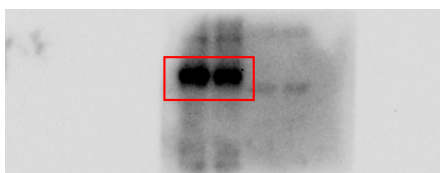

PANC-1 p-PI3K

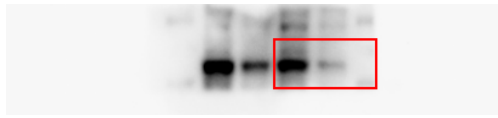

Supplement: MOESM6 [file 23846526]
